# Supplementary material
Source: Springer Nature journal article supplement (https://www.springermedizin.de/resource/supplementary/12885_2006_761_MOESM4_ESM.pdf/9470254)

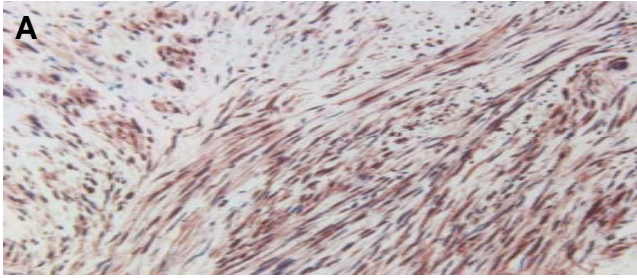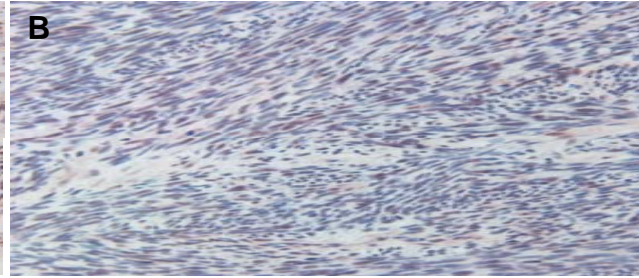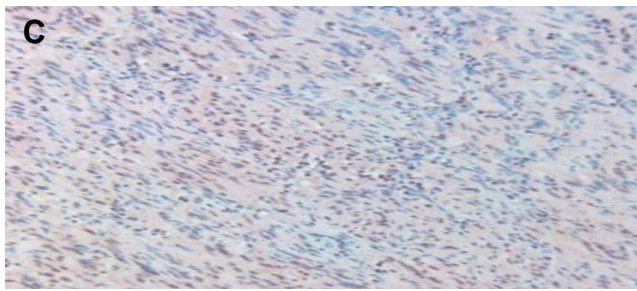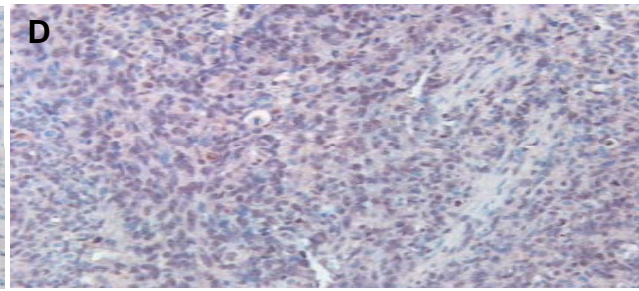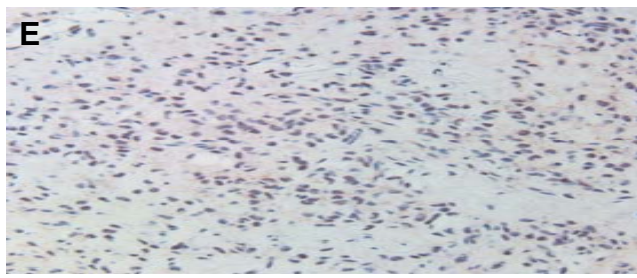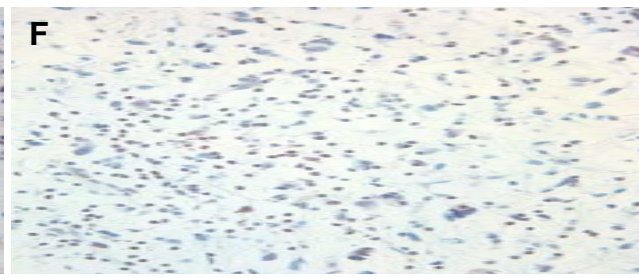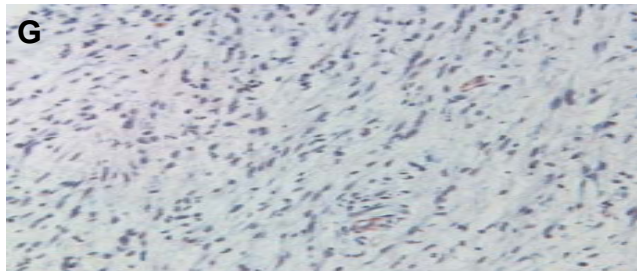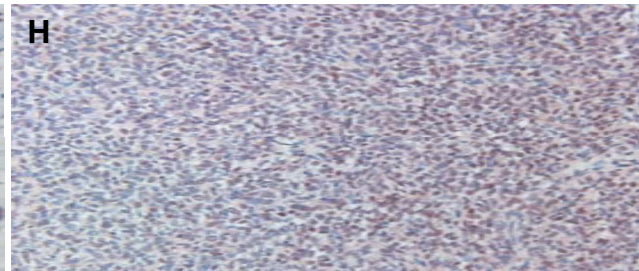

Supplement: MOESM4 [file 9470254]
